# Supplementary material for: Prognostic role of lncRNA TUG1 for cancer outcome: Evidence from 840 cancer patients
Source: PubMed Central journal article supplement (PMC5564827; doi:10.18632/oncotarget.17844), 2017-05-13
Supplement: oncotarget-08-50051-s001.pdf [file oncotarget-08-50051-s001.pdf]

## **Prognostic role of lncRNA TUG1 for cancer outcome: Evidence from 840 cancer patients**

### **Supplementary Materials**

**Supplementary Table 1: MOOSE checklist.** See [Supplementary\\_Table\\_1](#)
